# Supplementary material
Source: Springer Nature journal article supplement (https://www.springermedizin.de/resource/supplementary/12916_2011_505_MOESM1_ESM.pdf/9598056)
Supplement: MOESM1 [file 9598056]

### (D) Preservation of constitutive phosphorylation of LRRK2

1. Peptide 'capping' to protect these phosphosites from dephosphorylation by phosphatases, when LRRK2 is unbound to 14-3-3 – to keep LRRK2 soluble in cytoplasm

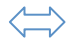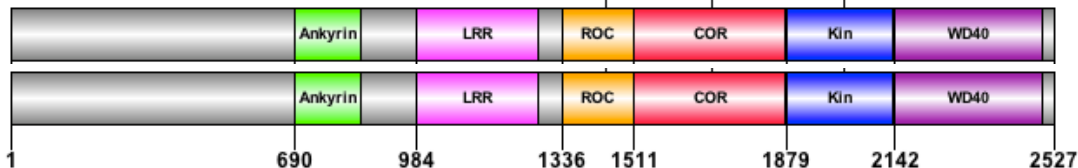

### (C) Interference of protein-protein interaction platform

1. Peptide inhibition to block binding of proteins involved in mediating cytotoxicity

### (A) Inhibition of kinase activity and GTP binding

1. Direct inhibition using ATP inhibitors on kinase domain – to attenuate kinase induced toxicity
2. Peptide blocking of the GTP binding pocket of ROC – to prevent any conformational change of LRRK2 upon GTP binding that may be associated with recruitment of mediators of cytotoxicity

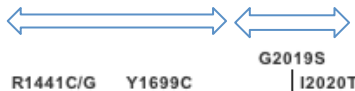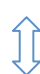

### (B) Disruption of LRRK2 dimerization

1. Peptide inhibition to interfere with dimer formation – to cause loss of kinase function

(C)
